# Supplementary material
Source: PubMed Central journal article supplement (PMC3038729)
Supplement: 1007217108_pnas.201007217SI.pdf [file 1007217108_pnas.201007217SI.pdf]

# Supporting Information

Beaumont et al. 10.1073/pnas.1007217108

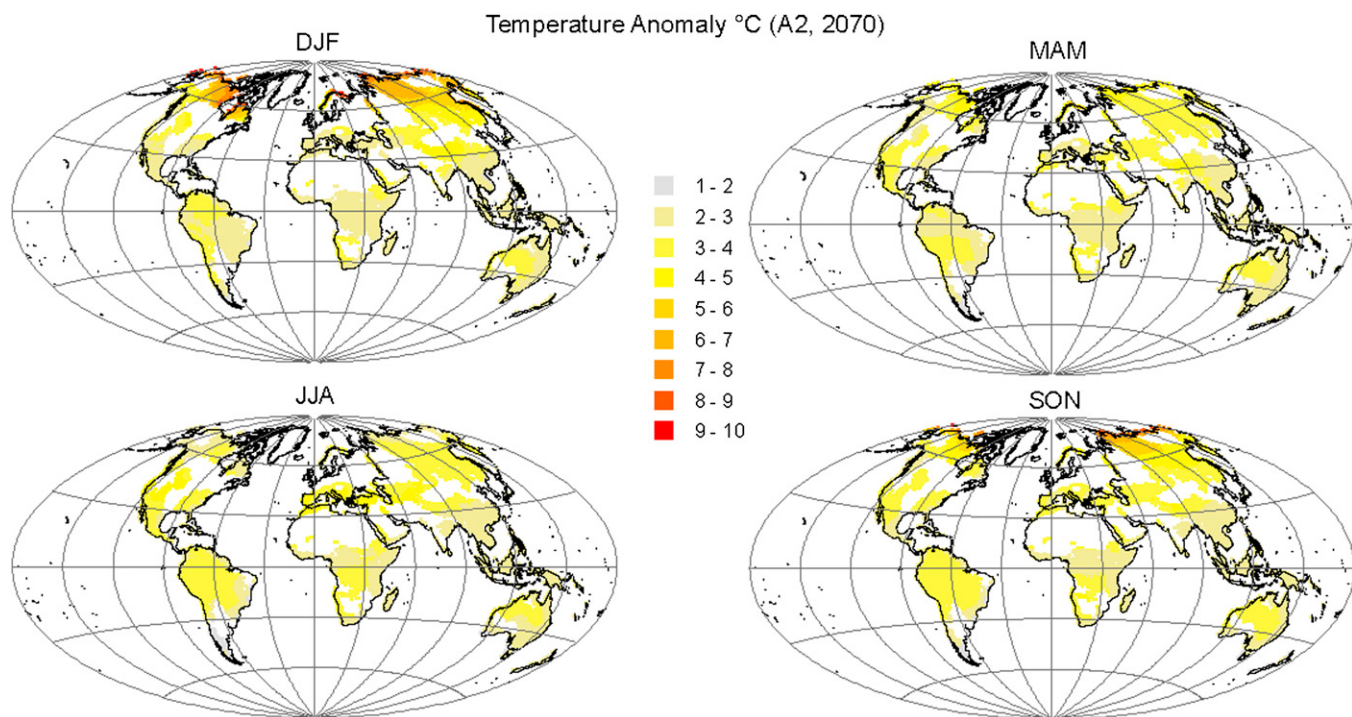

Fig. S1. Mean weighted temperature anomaly projected by the A2 emission scenario climate-model ensemble for 2070.

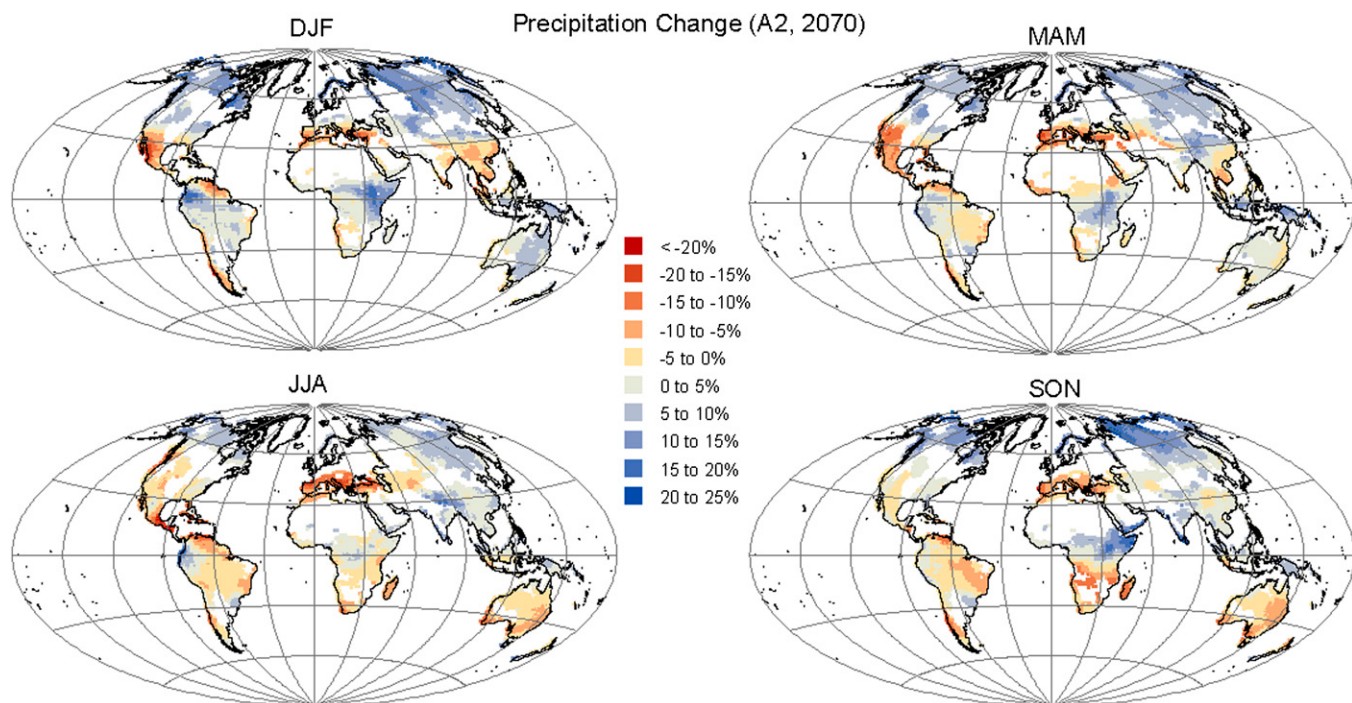

Fig. S2. Mean weighted precipitation change projected by the A2 emission scenario climate-model ensemble for 2070.



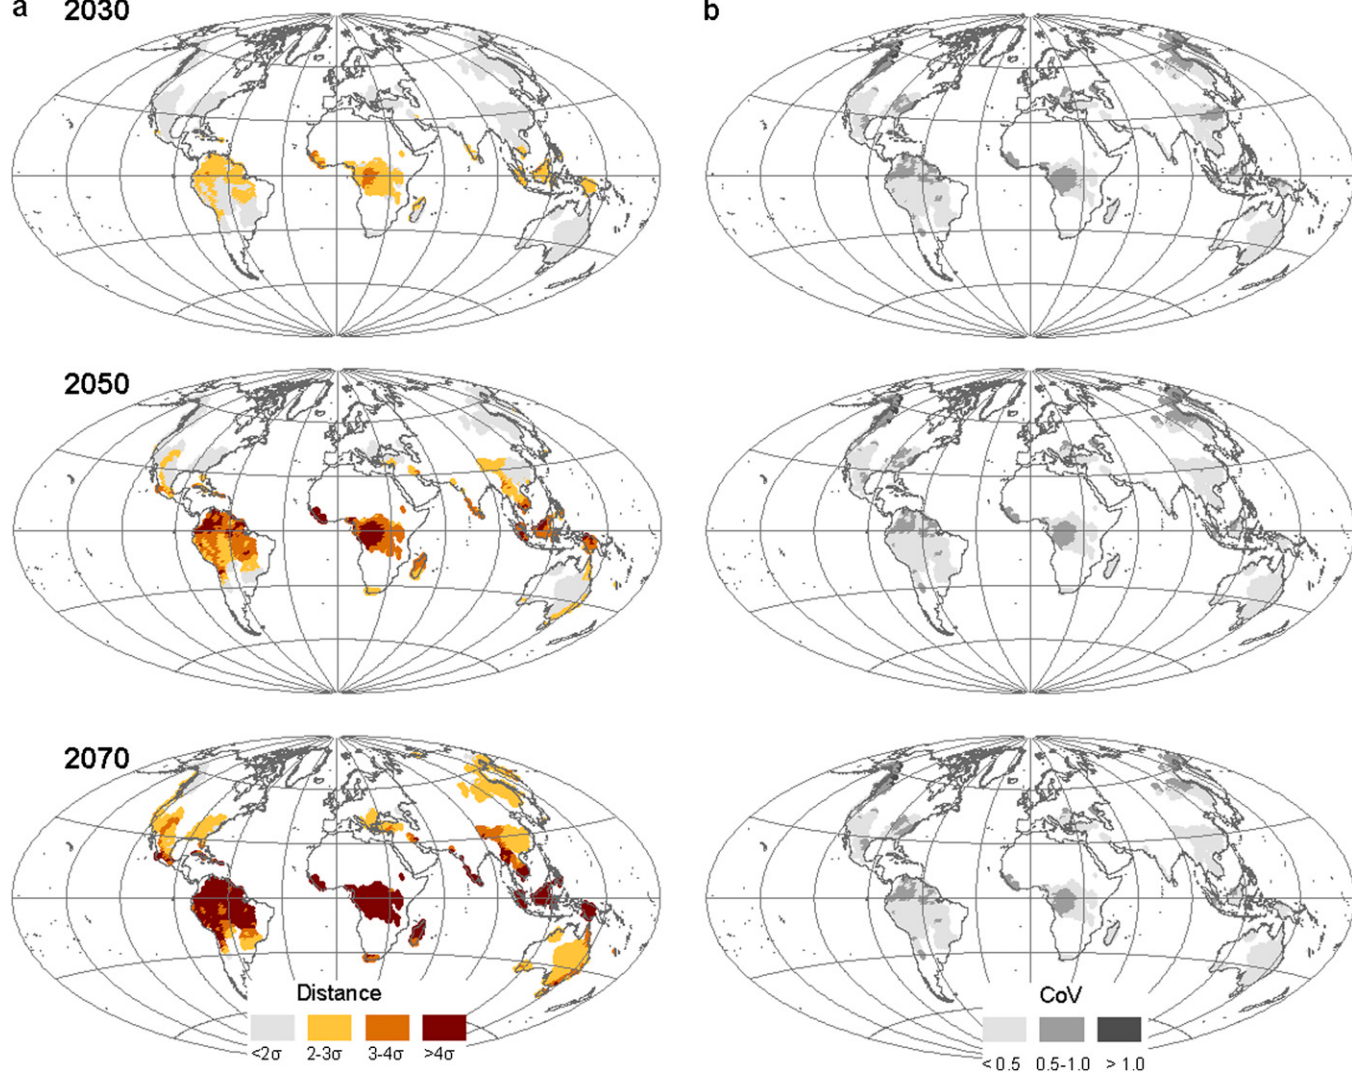

**Fig. S5.** Distribution of extreme monthly  $Tas_{\mu}$  projected across freshwater ecoregions for 2030, 2050, and 2070. (A) Average distance of 21st century monthly  $Tas_{\mu}$  from that of the baseline period (1961–1990), where distance is measured as SDs ( $\sigma$ ) from the mean ( $\mu$ ) of the baseline. Extreme monthly  $Tas_{\mu}$  is defined as exceeding  $2\sigma$  of the baseline  $\mu$ . Results are based on a climate model ensemble ( $n$  realizations = 173) for the A2 emission scenario. (B) The CoV shows variation across different realizations within the climate model ensemble. Areas with higher values for CoV indicate greater differences across alternate projections of future  $Tas_{\mu}$  and, hence, less certainty in distance values.

## Other Supporting Information Files

Table S1 (DOC)

Table S2 (DOC)

Table S3 (DOC)

Table S4 (DOC)
